# Supplementary material
Source: PubMed Central journal article supplement (PMC2710019)
Supplement: mmc1.pdf [file mmc1.pdf]

**Supplementary Material**

**Structure and alignment of the membrane-associated peptaibols  
ampullosporin A and alamethicin by oriented  $^{15}\text{N}$  and  $^{31}\text{P}$  solid-state  
NMR spectroscopy**

**Evgeniy S. Salnikov, Herdis Friedrich, Xing Li, Philippe Bertani, Siegmund  
Reissmann, Christian Hertweck, Joe D. J. O'Neil, Jan Raap, and Burkhard  
Bechinger**

## SUPPLEMENTARY INFORMATION

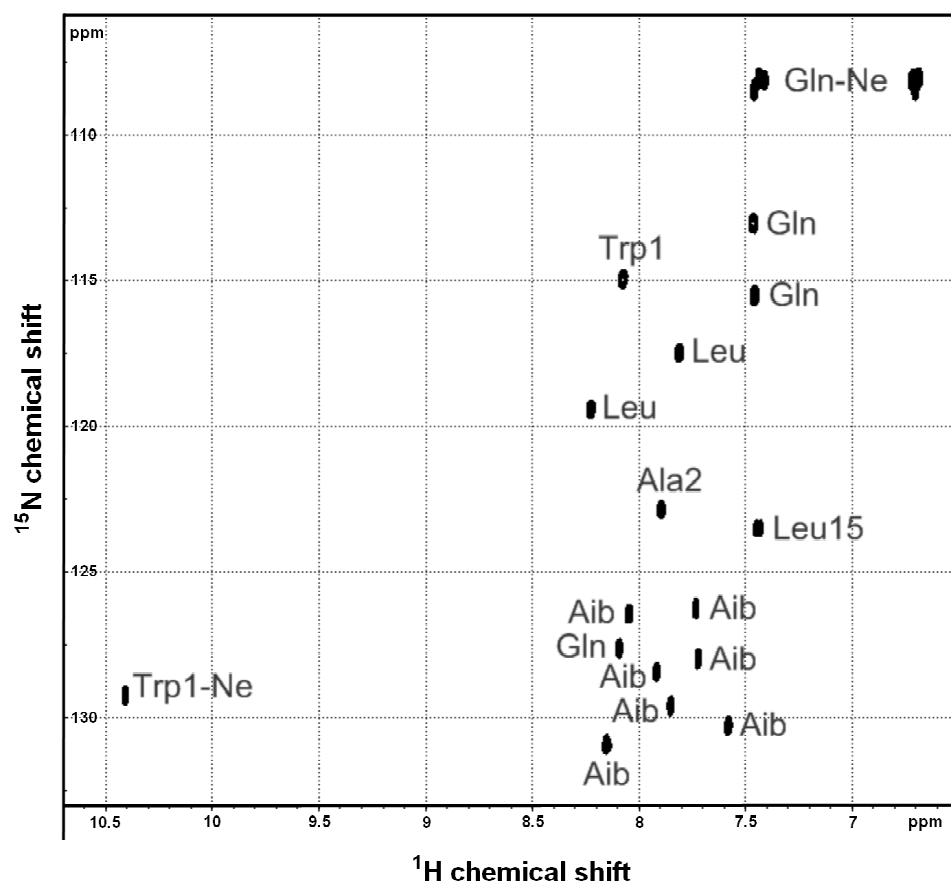

**Supplementary Figure S1.** HSQC spectrum of uniformly  $^{15}\text{N}$  labeled AmpA in  $\text{CD}_3\text{OH}$ .

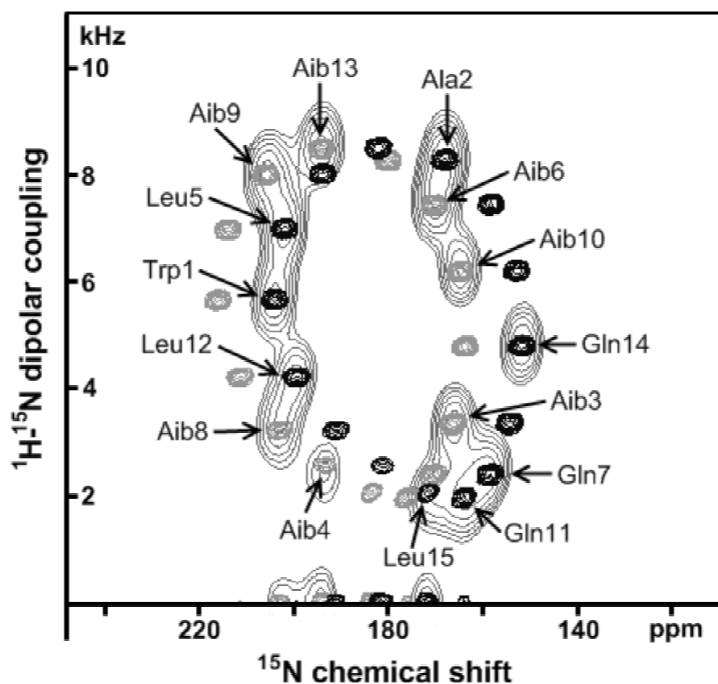

**Supplementary Figure S2:** The light grey spectrum exhibiting broadened line shapes shows the simulation of the PISEMA spectrum of an ideal  $\alpha$ -helix composed of the AmpA sequence at an alignment that best represents the experimental spectrum observed in di-C10:0-PC (cf. Fig. 4C). The tensor elements are ( $\delta_{\text{iso}}=129.5$  ppm,  $\delta_{\text{aniso}}=105$  ppm,  $\eta=0.2$ ) for the Aib residues and ( $\delta_{\text{iso}}=117.5$  ppm,  $\delta_{\text{aniso}}=105$  ppm,  $\eta=0.2$ ) for all other amino acid residues. The simulated line-width are 300 Hz in the  $^{15}\text{N}$  chemical shift- and 1 kHz in the dipolar coupling dimension. In order to illustrate how the simulated pattern arises from two ('incomplete') helical wheels that are shifted by 12 ppm from each other the corresponding PISA wheels (encompassing a complete set of 15 pitch angles) are shown as grey dots for ( $\delta_{\text{iso}}=117.5$  ppm,  $\delta_{\text{aniso}}=105$  ppm,  $\eta=0.2$ ) and as black dots for ( $\delta_{\text{iso}}=129.5$  ppm,  $\delta_{\text{aniso}}=105$  ppm,  $\eta=0.2$ ). The assignments point to those residues that compose the simulated AmpA helical spectrum (Fig. 4C).

## Ampullosporin A Production

Table S1: Ampullosporin A production in liquid and solid media

| Medium                 | Duration of incubation | ampullosporin A<br>( $\mu\text{g} / 100 \text{ ml}$ ) |
|------------------------|------------------------|-------------------------------------------------------|
| Liquid medium 1        | 6 Weeks                | 395,6                                                 |
| Liquid medium 2        | 6 Weeks                | 2,31                                                  |
| Liquid medium 3        | 6 Weeks                | 1018,1                                                |
| Liquid medium 4        | 6 Weeks                | 142,2                                                 |
| Liquid medium 5        | 6 Weeks                | 516,0                                                 |
| Liquid medium 6        | 6 Weeks                | 22,1                                                  |
| <b>Liquid medium 7</b> | <b>3 Weeks</b>         | <b>1206,6</b>                                         |
| Liquid medium 8        | 3 Weeks                | 908,5                                                 |
| Liquid medium 9        | 3 Weeks                | 615,9                                                 |
| Liquid medium 10       | 3 Weeks                | 321,4                                                 |
| Solid medium 1         | 6 Weeks                | 264,1                                                 |
| Solid medium 2         | 6 Weeks                | 43,5                                                  |
| Solid medium 3         | 6 Weeks                | 39,4                                                  |
| Solid medium 4         | 6 Weeks                | 6,7                                                   |
| Solid medium 5         | 6 Weeks                | 66,8                                                  |
| Solid medium 6         | 6 Weeks                | 0,8                                                   |
| Solid medium 7         | 3 Weeks                | 536,3                                                 |
| Solid medium 8         | 3 Weeks                | 366,9                                                 |
| Solid medium 9         | 3 Weeks                | 300,9                                                 |
| Solid medium 10        | 3 Weeks                | 329,1                                                 |

### Media

|                  |                                                                                                                                                                                                       |
|------------------|-------------------------------------------------------------------------------------------------------------------------------------------------------------------------------------------------------|
| Malt Medium (MA) | 40 g Malt extract, 4 g Yeast extract                                                                                                                                                                  |
| Medium 1         | 10 g Glucose, 3,5 g $(\text{NH}_4)_2\text{SO}_4$ , 2,0 g $\text{KH}_2\text{PO}_4$ , 0,5 g $\text{MgSO}_4 \times 7 \text{ H}_2\text{O}$ , 0,008 g $\text{ZnSO}_4 \times 7 \text{ H}_2\text{O}$         |
| Medium 2         | Medium 1 + 5,1 g $\text{CaCO}_3$                                                                                                                                                                      |
| Medium 3         | 10 g Maltose, 3,5 g $(\text{NH}_4)_2\text{SO}_4$ , 2,0 g $\text{KH}_2\text{PO}_4$ , 0,5 g $\text{MgSO}_4 \times 7 \text{ H}_2\text{O}$ , 0,008 g $\text{ZnSO}_4 \times 7 \text{ H}_2\text{O}$         |
| Medium 4         | Medium 3 + 5,1 g $\text{CaCO}_3$                                                                                                                                                                      |
| Medium 5         | 20 g Maltose, 3,5 g $(\text{NH}_4)_2\text{SO}_4$ , 2,0 g $\text{KH}_2\text{PO}_4$ , 0,5 g $\text{MgSO}_4 \times 7 \text{ H}_2\text{O}$ , 0,008 g $\text{ZnSO}_4 \times 7 \text{ H}_2\text{O}$         |
| Medium 6         | Medium 5 + 5,1 g $\text{CaCO}_3$                                                                                                                                                                      |
| Medium 7         | 5 g Maltose, 2 g Caseine Pepton, 2,0 g $\text{KH}_2\text{PO}_4$ , 0,5 g $\text{MgSO}_4 \times 7 \text{ H}_2\text{O}$ , 0,008 g $\text{ZnSO}_4 \times 7 \text{ H}_2\text{O}$ , pH 5,8 - 6,2            |
| Medium 7*        | 5 g Maltose, 2 g Celtone- $^{15}\text{N}$ , 2,0 g $\text{KH}_2\text{PO}_4$ , 0,5 g $\text{MgSO}_4 \times 7 \text{ H}_2\text{O}$ , 0,008 g $\text{ZnSO}_4 \times 7 \text{ H}_2\text{O}$ , pH 5,8 - 6,2 |
| Medium 8         | 10 g Maltose, 2 g Caseine Pepton, 2,0 g $\text{KH}_2\text{PO}_4$ , 0,5 g $\text{MgSO}_4 \times 7 \text{ H}_2\text{O}$ , 0,008 g $\text{ZnSO}_4 \times 7 \text{ H}_2\text{O}$ , pH 5,8 - 6,2           |
| Medium 9         | 5 g Glukose, 2 g Caseine Pepton, 2,0 g $\text{KH}_2\text{PO}_4$ , 0,5 g $\text{MgSO}_4 \times 7 \text{ H}_2\text{O}$ , 0,008 g $\text{ZnSO}_4 \times 7 \text{ H}_2\text{O}$ , pH 5,8 - 6,2            |
| Medium 10        | 10 g Glukose, 2 g Caseine Pepton, 2,0 g $\text{KH}_2\text{PO}_4$ , 0,5 g $\text{MgSO}_4 \times 7 \text{ H}_2\text{O}$ , 0,008 g $\text{ZnSO}_4 \times 7 \text{ H}_2\text{O}$ , pH 5,8 - 6,2           |

MK Agar  
39 g / l, pH 5,6)

1:1 Malt agar / Potatoe-Glucose-Agar (Fertigagar Merck,
